# Supplementary material
Source: publisher site journal article supplement (http://kjim.org/upload/media/kjim-2016-293-suppl1.pdf)
Supplement: Supplementary file 1 [file kjim-2016-293-suppl1.pdf]

**Supplementary Table 1. Univariate and multivariate analyses for prechemotherapy PFS**

| Variable                         | Univariate |           |         | Multivariate |           |         |
|----------------------------------|------------|-----------|---------|--------------|-----------|---------|
|                                  | HR         | 95% CI    | p value | HR           | 95% CI    | p value |
| <b>Age, yr</b>                   |            |           |         |              |           |         |
| < 65                             | 1.00       |           |         |              |           |         |
| ≥ 65                             | 1.06       | 0.87–1.28 | 0.589   |              | NS        |         |
| <b>Sex</b>                       |            |           |         |              |           |         |
| Female                           | 1.00       |           |         |              |           |         |
| Male                             | 1.18       | 0.97–1.43 | 0.091   |              | NS        |         |
| <b>Detecting metastasis</b>      |            |           |         |              |           |         |
| Recurrence                       | 1.00       |           |         | 1.00         |           |         |
| Initial diagnosis                | 1.49       | 1.21–1.84 | < 0.001 | 1.36         | 1.10–1.69 | 0.005   |
| <b>Histological type</b>         |            |           |         |              |           |         |
| Differentiated                   | 1.00       |           |         | 1.00         |           |         |
| Undifferentiated                 | 1.28       | 1.05–1.55 | 0.017   | 1.33         | 1.09–1.63 | 0.005   |
| <b>Peritoneal carcinomatosis</b> |            |           |         |              |           |         |
| No                               | 1.00       |           |         |              |           |         |
| Yes                              | 1.20       | 1.00–1.45 | 0.055   |              | NS        |         |
| <b>No. of metastatic organs</b>  |            |           |         |              |           |         |
| 1                                | 1.00       |           |         | 1.00         |           |         |
| ≥ 2                              | 1.58       | 1.30–1.92 | < 0.001 | 1.48         | 1.21–1.81 | < 0.001 |
| <b>First line chemotherapy</b>   |            |           |         |              |           |         |
| Cisplatin based                  | 1.00       |           |         |              |           |         |
| Non-cisplatin based              | 1.02       | 0.81–1.29 | 0.850   |              | NS        |         |
| <b>Prechemotherapy NLR</b>       |            |           |         |              |           |         |
| < 3.0                            | 1.00       |           |         | 1.00         |           |         |
| ≥ 3.0                            | 1.37       | 1.13–1.66 | 0.002   | 1.42         | 1.17–1.73 | < 0.001 |
| <b>Prechemotherapy mGPS</b>      |            |           |         |              |           |         |
| Low                              | 1.00       |           |         |              |           |         |
| High                             | 1.21       | 0.94–1.56 | 0.131   |              | NS        |         |

PFS, progression-free survival; HR, hazard ratio; CI, confidence interval; NS, not significant; NLR, neutrophil-to-lymphocyte ratio; mGPS, modified Glasgow prognostic score.
